# Supplementary material
Source: PubMed Central journal article supplement (PMC137880)

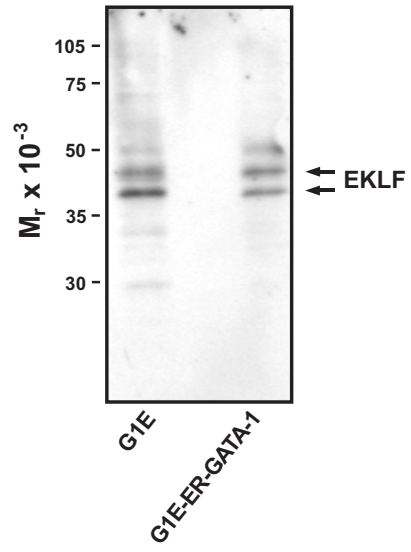

Supplement: pnas_212389499_2.pdf [file pnas_212389499_2.pdf]
